# Supplementary material for: Cognitive Stress Regulation in Schizophrenia Patients and Healthy Individuals: Brain and Behavior
Source: MDPI journal article supplement (doi:10.3390/jcm12072749), 2023-04-06
Supplement: s1 [file s1]

**Cognitive stress regulation in schizophrenia patients and healthy individuals: brain and behavior.**

**Supplementary material Table S1. Whole brain analysis.**

**Table S1.**

| Contrast                                               | Cluster size | Macronanatomical location                                                        | Cytoarchitectonical activation | X                               | Y                              | Z                          | t value                                                                 |
|--------------------------------------------------------|--------------|----------------------------------------------------------------------------------|--------------------------------|---------------------------------|--------------------------------|----------------------------|-------------------------------------------------------------------------|
| Healthy controls<br>Non-regulation<br>Control > stress | 112          | R Precuneus                                                                      |                                | 6                               | -48                            | 22                         | STAT = 3.99                                                             |
| Healthy controls<br>Non-regulation<br>Stress > control | 119          | N/A<br>R Olfactory cortex                                                        | Area 33                        | 14<br>4                         | 26<br>20                       | -4<br>0                    | STAT = 4.87<br>STAT = 4.43                                              |
| Healthy controls<br>Regulation<br>Control > stress     |              | non significant                                                                  |                                |                                 |                                |                            |                                                                         |
| Healthy controls<br>Regulation<br>Stress > control     | 180          | L Middle Frontal Gyrus<br>L Precentral Gyrus<br>N/A<br>N/A<br>L Precentral Gyrus |                                | -28<br>-34<br>-20<br>-14<br>-36 | -12<br>-8<br>-14<br>-12<br>-14 | 56<br>60<br>58<br>58<br>60 | STAT = 4.03<br>STAT = 3.78<br>STAT = 3.66<br>STAT = 3.65<br>STAT = 3.53 |

|                                                                 |      |                                                                                                                                                                               |                                                                                                                                                                                        |                                                                                                                                                                   |
|-----------------------------------------------------------------|------|-------------------------------------------------------------------------------------------------------------------------------------------------------------------------------|----------------------------------------------------------------------------------------------------------------------------------------------------------------------------------------|-------------------------------------------------------------------------------------------------------------------------------------------------------------------|
| <b>Healthy controls<br/>Non-regulation &gt;<br/>regulation</b>  |      | non significant                                                                                                                                                               |                                                                                                                                                                                        |                                                                                                                                                                   |
| <b>Healthy controls<br/>Regulation &gt; non-<br/>regulation</b> | 1622 | L Paracentral Lobule<br>R Posterior-Medial Frontal<br>R Paracentral Lobule      Area 4a<br>L MCC<br>L Superior Medial Gyrus<br>N/A<br>N/A<br>L MCC<br>L MCC<br>L MCC<br>L MCC | -10   -32   56<br>12   -30   54<br>8   -32   68<br>-12   0   46<br>-10   24   46<br>-12   20   44<br>-14   8   48<br>-12   -22   48<br>-10   -14   56<br>12   -16   50<br>6   -22   48 | STAT = 6.08<br>STAT = 5.60<br>STAT = 4.94<br>STAT = 4.91<br>STAT = 4.84<br>STAT = 4.74<br>STAT = 4.34<br>STAT = 4.24<br>STAT = 4.19<br>STAT = 4.10<br>STAT = 3.66 |
|                                                                 | 621  | N/A<br>R Rolandic Operculum<br>N/A<br>N/A<br>N/A<br>N/A<br>R IFG (p. Triangularis)<br>R Caudate Nucleus<br>R IFG (p. Triangularis)<br>R IFG (p. Triangularis)                 | 26   6   30<br>46   -18   26<br>32   -36   10<br>24   -12   28<br>34   -14   26<br>22   -8   24<br>46   16   30<br>22   14   18<br>32   16   32<br>52   20   32                        | STAT = 4.55<br>STAT = 4.46<br>STAT = 4.42<br>STAT = 4.35<br>STAT = 4.21<br>STAT = 4.18<br>STAT = 4.10<br>STAT = 4.08<br>STAT = 3.94<br>STAT = 3.93                |

Kogler et al.; JCM; Supplementary material. Table S1.

|                                                                          |                        |            |             |
|--------------------------------------------------------------------------|------------------------|------------|-------------|
|                                                                          | N/A                    | 22 -18 28  | STAT = 3.90 |
| 554                                                                      | N/A                    | -20 8 20   | STAT = 4.91 |
|                                                                          | N/A                    | -20 -22 26 | STAT = 4.55 |
|                                                                          | N/A Thal: Parietal     | -28 -32 8  | STAT = 4.38 |
|                                                                          | N/A                    | -20 -2 24  | STAT = 4.34 |
|                                                                          | N/A                    | -28 -42 18 | STAT = 4.33 |
|                                                                          | N/A                    | -30 -42 14 | STAT = 4.20 |
|                                                                          | N/A Thal: Parietal     | -24 -30 18 | STAT = 3.80 |
|                                                                          | N/A                    | -22 16 28  | STAT = 3.77 |
|                                                                          | L Hippocampus          | -30 -26 -4 | STAT = 3.50 |
|                                                                          | N/A                    | -28 -4 26  | STAT = 3.45 |
|                                                                          | L Hippocampus          | -32 -32 0  | STAT = 3.32 |
| 296                                                                      | L IFG (p. Orbitalis)   | -30 30 -2  | STAT = 5.28 |
|                                                                          | L IFG (p. Orbitalis)   | -22 30 -2  | STAT = 4.90 |
|                                                                          | L Caudate Nucleus      | -10 20 4   | STAT = 4.11 |
|                                                                          | N/A                    | -18 40 -4  | STAT = 3.49 |
| 241                                                                      | L Middle Frontal Gyrus | -34 40 24  | STAT = 5.11 |
|                                                                          | N/A                    | -28 32 20  | STAT = 4.17 |
| <b>Schizophrenia patients<br/>Non-regulation<br/>Control &gt; stress</b> | non significant        |            |             |

|                                                                                              |                                                                                             |                                                                   |                                                                         |
|----------------------------------------------------------------------------------------------|---------------------------------------------------------------------------------------------|-------------------------------------------------------------------|-------------------------------------------------------------------------|
| <b>Schizophrenia patients</b><br><b>Non-regulation</b><br><b>Stress &gt; control</b>         | non significant                                                                             |                                                                   |                                                                         |
| <b>S Schizophrenia patients</b><br><b>Regulation</b><br><b>Control &gt; stress</b>           | non significant                                                                             |                                                                   |                                                                         |
| <b>Schizophrenia patients</b><br><b>Regulation</b><br><b>Stress &gt; control</b><br><br>134  | L Precentral Gyrus<br>L Precentral Gyrus<br>L Precentral Gyrus<br>L Precentral Gyrus<br>N/A | -28 -12 54<br>-34 -14 52<br>-36 -14 60<br>-32 -8 60<br>-24 -16 44 | STAT = 3.78<br>STAT = 3.72<br>STAT = 3.49<br>STAT = 3.26<br>STAT = 3.19 |
| <b>Schizophrenia patients</b><br><b>Non-regulation &gt;</b><br><b>regulation</b>             | non significant                                                                             |                                                                   |                                                                         |
| <b>Schizophrenia patients</b><br><b>Regulation &gt; non-</b><br><b>regulation</b><br><br>281 | L Mid Orbital Gyrus<br>R Mid Orbital Gyrus<br>N/A                                           | 0 40 -8<br>10 42 -8<br>18 32 4                                    | STAT = 4.38<br>STAT = 4.10<br>STAT = 3.77                               |

Kogler et al.; JCM; Supplementary material. Table S1.

|                                         |                                              |     |     |     |             |
|-----------------------------------------|----------------------------------------------|-----|-----|-----|-------------|
|                                         | N/A                                          | 20  | 38  | -2  | STAT = 3.67 |
|                                         | N/A                                          | 16  | 42  | -2  | STAT = 3.66 |
|                                         | R Rectal Gyrus                      Area Fo1 | 6   | 46  | -14 | STAT = 3.27 |
| 167                                     | R Middle Frontal Gyrus                       | 44  | 22  | 44  | STAT = 4.37 |
|                                         | R Middle Frontal Gyrus                       | 36  | 20  | 50  | STAT = 4.22 |
|                                         | R Middle Frontal Gyrus                       | 34  | 30  | 46  | STAT = 4.01 |
|                                         | R Middle Frontal Gyrus                       | 44  | 16  | 46  | STAT = 3.99 |
|                                         | R Middle Frontal Gyrus                       | 30  | 16  | 54  | STAT = 3.81 |
|                                         | R Middle Frontal Gyrus                       | 42  | 28  | 42  | STAT = 3.79 |
|                                         | R Superior Frontal Gyrus                     | 26  | 24  | 54  | STAT = 3.48 |
|                                         | R Middle Frontal Gyrus                       | 34  | 34  | 44  | STAT = 3.37 |
| 157                                     | L MCC                                        | 0   | -46 | 40  | STAT = 4.13 |
|                                         | L Precuneus                                  | -4  | -66 | 36  | STAT = 4.02 |
|                                         | L PCC                                        | 0   | -58 | 38  | STAT = 3.69 |
| 149                                     | L Insula Lobe                                | -34 | -28 | 28  | STAT = 3.96 |
|                                         | N/A                                          | -28 | -22 | 26  | STAT = 3.71 |
|                                         | N/A                                          | -30 | -36 | 28  | STAT = 3.55 |
|                                         | N/A                                          | -38 | -22 | 30  | STAT = 3.47 |
|                                         | L Rolandic Operculum                         | -40 | -20 | 28  | STAT = 3.26 |
| <b>Whole-brain F-test</b>               |                                              |     |     |     |             |
| <b>Group-by-regulation-by-condition</b> |                                              |     |     |     |             |
| 147                                     |                                              |     |     |     |             |

|  |                      |                |     |     |    |             |
|--|----------------------|----------------|-----|-----|----|-------------|
|  | L Rolandic Operculum | Area OP1 [SII] | -46 | -26 | 18 | STAT = 8.19 |
|  | L Insula Lobe        | Area OP3 [VS]  | -34 | -20 | 20 | STAT = 8.14 |
|  | L Postcentral Gyrus  | Area OP1 [SII] | -52 | -24 | 20 | STAT = 7.49 |

**Supplement Table S1.** Brain regions and activation peaks showing whole-brain analyses convergence in activation for healthy controls and schizophrenia patients (control, stress, non-regulation block, regulation block) separately.

Note. Coordinates x, y, z of local maxima refer to Montreal Neurological Institute space (MNI). k = number of voxels in cluster. An extent threshold of k=99 contiguous voxels corresponds to a corrected threshold of  $p < .05$ .

References for histological assignments: OP1, OP 3, OP 4: [33,52]; Area 1: [53]; Area PFt (IPL), Area PGa (IPL), Area PFm (IPL), Area PGp (IPL): [54]; Area Fp2 [55]; Area 45: [56].
